# Supplementary material for: Flubendazole induces mitochondrial dysfunction and DRP1-mediated mitophagy by targeting EVA1A in breast cancer
Source: PubMed Central journal article supplement (PMC9019038; doi:10.1038/s41419-022-04823-8), 2022-04-19
Supplement: 41419_2022_4823_MOESM4_ESM.pdf [file 41419_2022_4823_MOESM4_ESM.pdf]

## Author change agreement request

 我 2022-03-30 12:44  
发至 zhanglanx\_9@126.com、zhouxl、simplezyq、2461997888、2401330343、910717627、1143005407、1624381752 收起

**CDDIS-21-2498RR Author changes agreement request**

---

Dear co-authors,

This is an explanation and confirmation message. During the revision process of the manuscript "Flubendazole induces mitochondrial dysfunction and DRP1-mediated mitophagy in breast cancer by targeting EVA1A", Zhaoxin Yuan made great contributions, including collected the materials and analyzed the data. Therefore, we have invited Zhaoxin Yuan as one of our co-authors. Thus, we confirm with all co-authors whether agree with the above decision. Thank you for everything you have done and we look forward to your kind reply.

Best regards,

Dr. Leilei Fu

## Response of Dr. Yongqi Zhen

 YONGQI ZHEN 2022-03-30 12:55  
发至 Francie ; 抄送 我、zhanglanx\_9@126.com、zhouxl、2461997888、2401330343、1143005407、1624381752 收起

**Re: CDDIS-21-2498RR Author changes agreement request**

---

I have received the message, I agreed that revise.

[展开引用](#)

## Response of Zhaoxin Yuan

 阿瞻 2022-03-30 13:07  
发至 我 收起

**回复: CDDIS-21-2498RR Author changes agreement request**

---

Dr. Fu

Thank you very much for your invitation. I agree with your proposal.

Best regards,

Zhaoxin Yuan

[展开引用](#)

## Response of Jiahui Zhang

 2401330343 2022-03-30 13:09  
发至 我 收起

**Re: CDDIS-21-2498RR Author changes agreement request**

---

I have received the message, I agreed that revise.

[展开引用](#)

## Response of Yao Chen

 **陈尧** 2022-03-30 12:59  
发至 我 🔗 ...  
收起

回复: CDDIS-21-2498RR Author changes agreement request

---

I have received the message, I agreed that revise.  
[展开引用](#) ▾

## Response of Yuning Fu

 **Francie** 2022-03-30 12:51  
发至 我、zhanglanx\_9@126.com、zhouxl、simplezyq、2461997888、2401330343、1143005407、1624381752 🔗 ...  
收起

回复: CDDIS-21-2498RR Author changes agreement request

---

I have received the message, I agreed that revise.

## Response of Yi Liu

**Re: CDDIS-21-2498RR Author changes agreement request** leilei\_fu@163.com 升级会员

 **林七月** 2022-03-30 13:10  
发至 我 🔗 🔄 📄 ...  
详情

---

I have received the message, I agreed that revise.

---Original---

## Response of Dr. Lan Zhang

 **zhanglanx\_9@126.com** 2022-03-30 12:47  
发至 我 🔗 ...  
详情

---

Dear Dr. Fu

I agree with this author change.

Best  
Dr. Lan Zhang

## Response of Prof. Xian-Li Zhou

 **周先礼** 2022-03-30 14:32  
发至 我 🔗 ...  
详情

---

I have received the message, I agreed that revise.

Xianli Zhou  
[展开引用](#) ▾
